# Supplementary material for: The Effects of Moxifloxacin and Gemifloxacin on the ECG Morphology in Healthy Volunteers: A Phase 1 Randomized Clinical Trial
Source: MDPI journal article supplement (doi:10.3390/diagnostics13071234), 2023-03-24
Supplement: s1 [file s1]

**Table S1. PROFOMA FOR REPORTING ADRs DURING CLINICAL TRIAL PERIOD**

|                       |                |          |                   |           |               |                   |  |
|-----------------------|----------------|----------|-------------------|-----------|---------------|-------------------|--|
| <b>Volunteer Name</b> |                |          | <b>Age</b>        | <b>BP</b> | <b>Dated:</b> | <b>Pulse rate</b> |  |
| <b>Sex</b>            | <b>M</b>       | <b>F</b> | <b>Contact No</b> |           |               |                   |  |
| <b>Marital status</b> | <b>Married</b> |          | <b>Unmarried</b>  |           |               | <b>Weight</b>     |  |
| <b>Address</b>        |                |          |                   |           |               |                   |  |
| <b>Family History</b> |                |          |                   |           |               |                   |  |

| Fluroquinolones used |                     |  | Daily Dose | Dose duration | Yes/NO |
|----------------------|---------------------|--|------------|---------------|--------|
| 1                    | <i>Moxifloxacin</i> |  | 400 mg     | 5 days        |        |
| 2                    | <i>Gemifloxacin</i> |  | 325 mg     | 5 days        |        |

**Adverse/Side Effects and Non-Compliance:**

|                |                            |                            |
|----------------|----------------------------|----------------------------|
| <b>S.no.1</b>  | <b><i>Moxifloxacin</i></b> | <b>Compliance (Yes/No)</b> |
|                |                            |                            |
|                |                            |                            |
|                |                            |                            |
|                |                            |                            |
|                |                            |                            |
| <b>S.no .2</b> | <b><i>Gemifloxacin</i></b> | <b>Compliance (Yes/No)</b> |
|                |                            |                            |
|                |                            |                            |
|                |                            |                            |
|                |                            |                            |
|                |                            |                            |
